# Supplementary material
Source: PubMed Central journal article supplement (PMC4506869)
Supplement: NIHMS698138-supplement-1.pdf [file NIHMS698138-supplement-1.pdf]

## Supplemental Figure 1

**A**

### DC Maturation

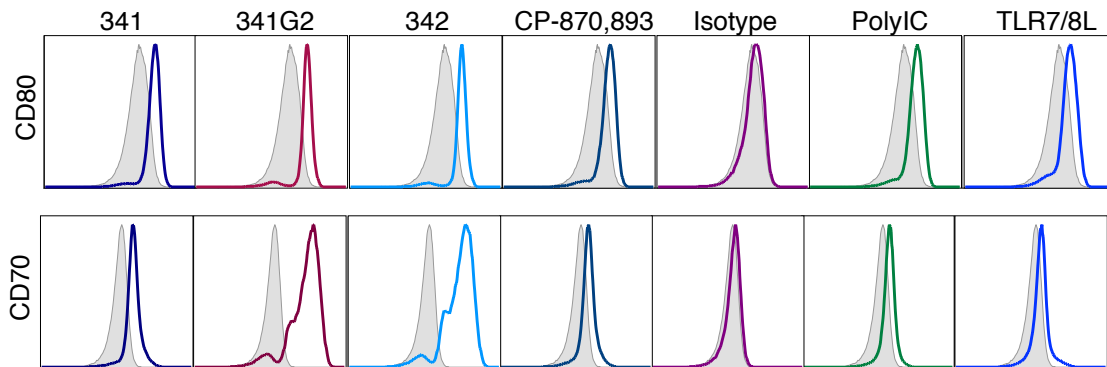

**B**

### DC IL-12 p40/p70 Production

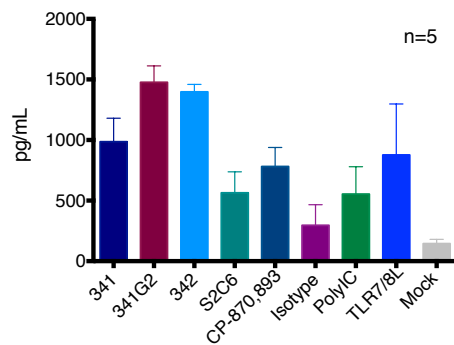

**C**

### B Cell Proliferation

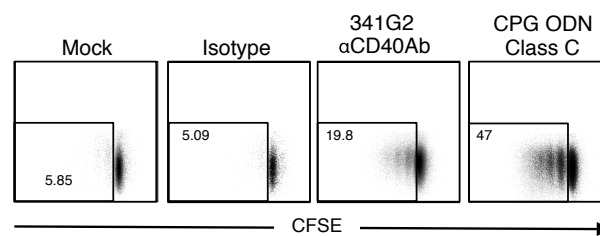

**D**

### Liver Function Tests

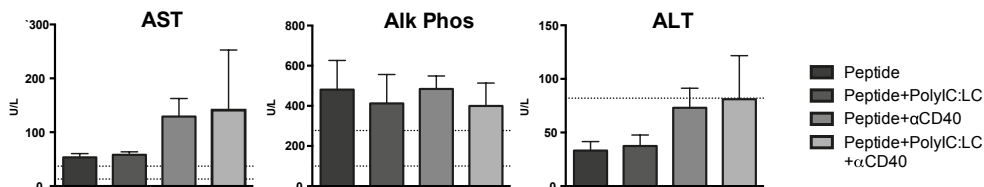

## Supplemental Figure 1: Characterization of agonistic anti-CD40 clones

**(A)** Human MDDCs were stimulated overnight with anti-CD40 Ab produced based on previously established sequences (figure labels indicate original clone name, see references 14, 17, 18), polyIC, TLR7/8L or an isotype Ab control. Maturation was assessed by CD70 and CD80 upregulation compared to donor matched unstimulated MDDCs **(B)** IL-12p40/p70 levels in supernatants from stimulated rhesus MDDCs as measured by ELISA (Mean±SEM, n=5). **(C)** Purified CD19+ human B cells were CFSE labeled and stimulated as indicated for 5 days to determine B cell proliferation. **(D)** Results from standard liver function test panel taken 48 hours after primary immunization of Figure 4, dotted lines represent normal conditions for rhesus macaques (Mean±SEM, n=5/group).

## Supplemental Figure 2

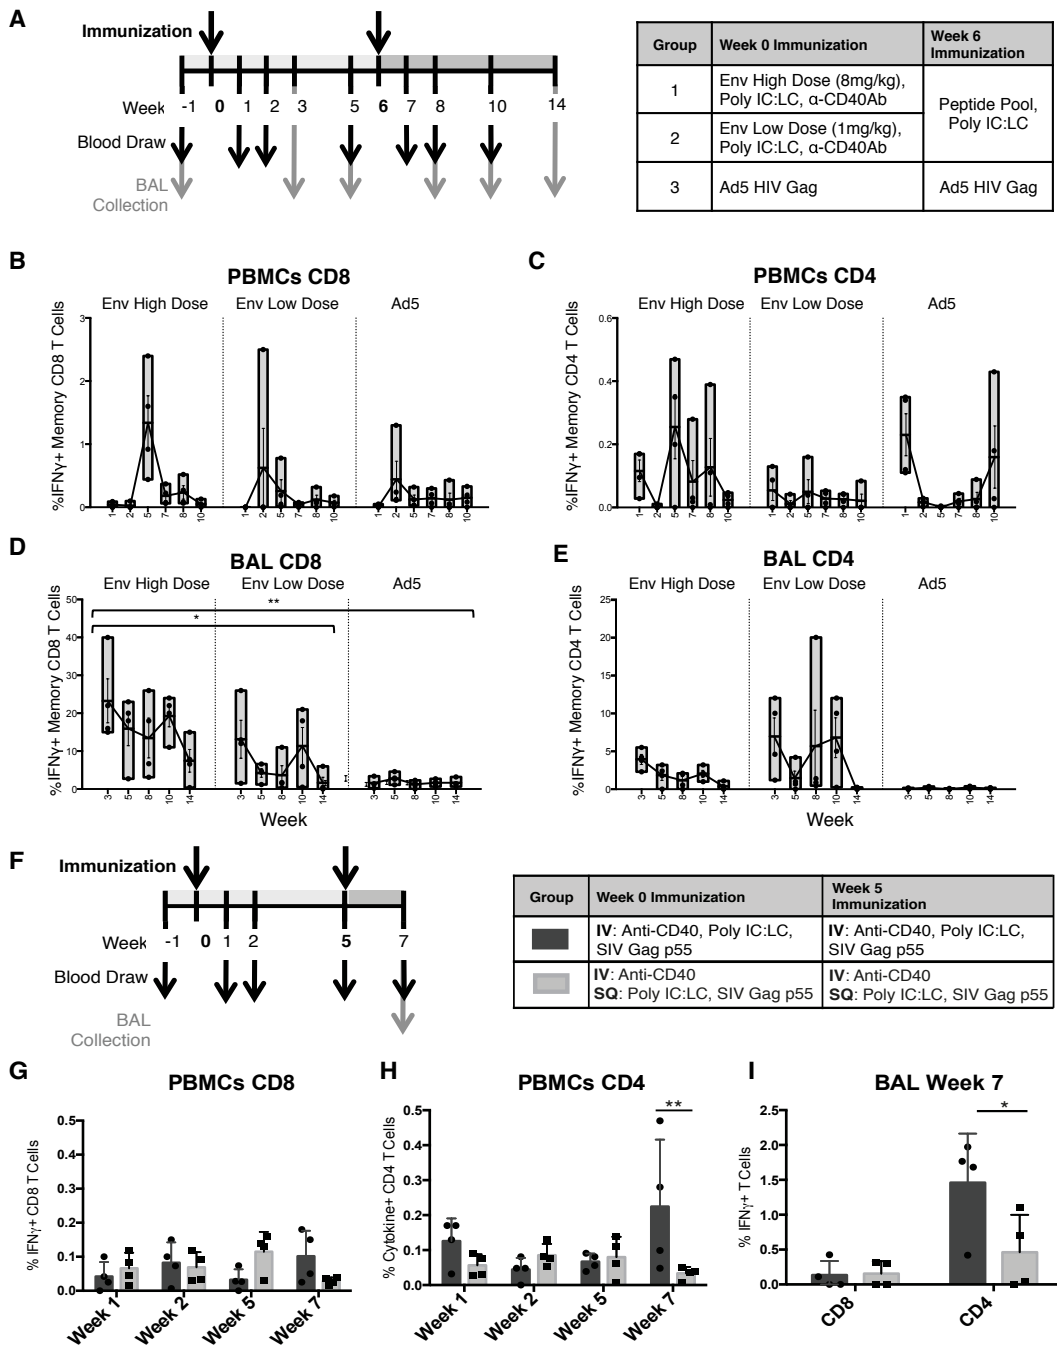

**Supplemental Figure 2: Pilot studies establish immunogenicity of Anti-CD40 and Poly IC:LC in rhesus macaques**  $\alpha$ CD40Ab was tested in combination with poly IC:LC to determine its ability to enhance Ag-specific T cell responses. Experimental design and results shown for two pilot studies, a dose study of synthetic long peptides (A-E) and a route of administration test with protein antigen (F-I) (A) Animals (n=5/group) were immunized i.v. with a high dose (8mg/kg) or low dose (4mg/kg) of Env peptide pool with poly IC:LC (1mg) and  $\alpha$ CD40Ab (1.5mg/kg). A third group received rAd5 HIV Gag i.m. ( $1 \times 10^{10}$  PFU). At week 6 animals received a boost of the Env peptide pool (1mg/kg) with poly IC:LC (1mg). (F) Animals (n=4/group) were immunized i.v. with  $\alpha$ CD40Ab (1.5mg/kg) and received protein SIV Gag p55 (1mg) with Poly IC:LC (1mg) either i.v. or s.q. Animals received a homologous boost at week 5. Blood and BAL samples were collected as indicated in (A and F) and analyzed in an ICS-based assay for T cell responses (B-E, G-I) PBMC and BAL samples were stimulated overnight with a matching immunizing peptide pool to recall total memory (CD45RA<sup>+</sup> and CCR7<sup>+</sup> naive cells excluded) are indicated in bar graphs, \* $p \leq 0.05$  and \*\* $p \leq 0.005$  using two-way ANOVA

**Supplemental Figure 3**

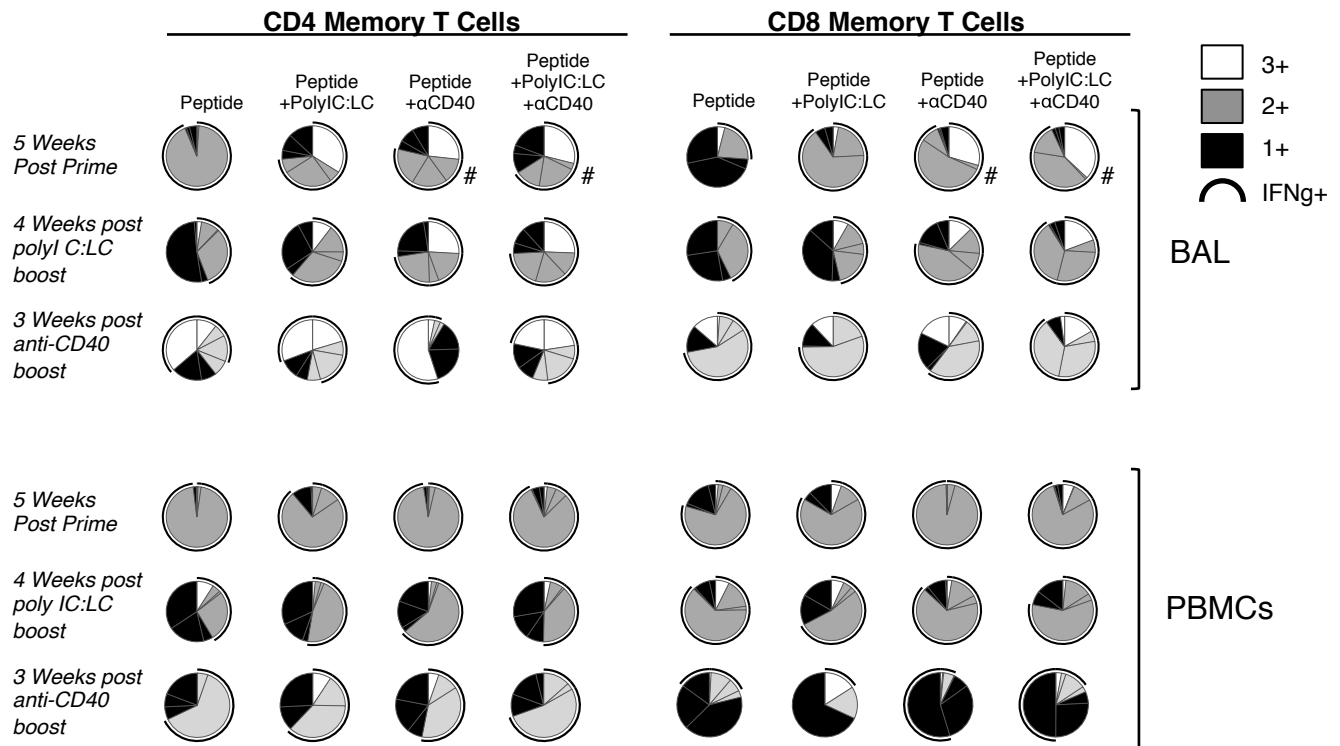

**Supplemental Figure 3: Polyfunctionality of Env-specific T cells in different adjuvant groups**

Pie charts show the proportion of total memory CD4/CD8 T cells producing IFN $\gamma$ , IL-2, and TNF (white), 2+ cells producing any two of IFN $\gamma$ , IL-2, and TNF (grey), and 1+ cells producing IFN $\gamma$ , IL-2, or TNF alone (black). The black arc represents cells that produce IFN $\gamma$ . Significant time points are compared to peptide only group.

**Supplemental Table I:** Fluorescently labeled antibodies used in flow cytometry

| <i>PBMC Phenotyping 1</i> |              |                 | <i>PBMC Phenotyping 2</i> |              |               | <i>CD40 Tracking</i> |              |               | <i>T Cell Responses</i> |              |                 |
|---------------------------|--------------|-----------------|---------------------------|--------------|---------------|----------------------|--------------|---------------|-------------------------|--------------|-----------------|
| Antibody                  | Fluorochrome | Supplier        | Antibody                  | Fluorochrome | Supplier      | Antibody             | Fluorochrome | Supplier      | Antibody                | Fluorochrome | Supplier        |
| CD20                      | V450         | BD Horizon      | CD70                      | PE-CF594     | BD Horizon    | CD70                 | PE-CF594     | BD Horizon    | CD103                   | APC          | Beckman Coulter |
| CD69                      | FITC         | BD Pharmingen   | CD80                      | PE           | BD Pharmingen | CD80                 | BV605        | BD Horizon    | CD69                    | Cy5PE        | BioLegend       |
| CD8                       | PerCp Cy55   | BD Pharmingen   | CD123                     | PerCP Cy55   | BD Pharmingen | CD123                | PerCP Cy55   | BD Pharmingen | NKG2a                   | PE           | Beckman Coulter |
| CD95                      | Cy7PE        | BD Pharmingen   | CD20                      | Cy7APC       | BD Pharmingen | CD11c                | Cy7PE        | BioLegend     | CCR7                    | BV421        | Biolegend       |
| NKG2a                     | PE           | Beckman Coulter | CD40                      | FITC         | Biolegend     | CD20                 | BV650        | BioLegend     | CD4                     | BV785        | BioLegend       |
| HLA-DR                    | TRPE         | Invitrogen      | CD11c                     | Cy7PE        | BioLegend     | CD16                 | BV570        | BioLegend     | CD8                     | BV711        | BioLegend       |
| CD14                      | QD800        | Invitrogen      | CCR7                      | BV421        | Biolegend     | CCR7                 | BV421        | Biolegend     | CD45RA                  | Cy7PE        | BD Pharmingen   |
| CD4                       | Alexa680     | BD Pharmingen   | CD16                      | Alexa700     | BioLegend     | HLA-DR               | Cy55PE       | Invitrogen    | TCRY $\delta$           | PE-CF594     | BD Horizon      |
| CD66abce                  | APC          | Miltenyi        | HLA-DR                    | Cy55PE       | Invitrogen    | CD14                 | QD800        | Invitrogen    | TNF                     | BV650        | Biolegend       |
| CD3                       | Cy7APC       | BD Pharmingen   | CD14                      | QD800        | Invitrogen    | BDCA1                | FITC         | Miltenyi      | IL2                     | BV605        | BioLegend       |
|                           |              |                 | BDCA-1                    | APC          | Miltenyi      | Clec9A               | PE           | Miltenyi      | IFN $\gamma$            | FITC         | BD              |
|                           |              |                 | CD3                       | Cy7APC       | BD Pharmingen | CD66                 | APC          | Miltenyi      | CD3                     | Cy7APC       | BD Pharmingen   |
